# Supplementary material for: A real-world study on clinical predictors of relapse after hospitalized detoxification in a Chinese cohort with alcohol dependence
Source: PeerJ. 2019 Aug 28;7:e7547. doi: 10.7717/peerj.7547 (PMC6717497; doi:10.7717/peerj.7547)
Supplement: Supplemental Information 1 [file peerj-07-7547-s001.xls]

## Sheet: alochol_follow_up（7.13）
code	smoking(1=yes）	gender(1=male）	age	education_years	duration of alcohol use	the length of IDF	times of hospitalization for alcohol detoxification	CCMBI(1=received,2= refused)	AUDIT_TOTAL	Discharge with benzodiazepines(1=yes)	Discharge with topiramate(1=yes)	with Brain atrophy(1=yes)	Discharge with antipsychotic(1=yes)	Discharge with antidepressants(1=yes)	Discharge with antiepileptics(1=yes)	1=relapse,0= not relapse	time to event(relapse)	length of hospital stay days
1	1	1	27	9	12	11	1	1	14	0	1	0	1	1	1	1	2	21
2	1	1	35	9	10	11	2	1	23	1	1	0	1	0	1	1	1	14
3	1	1	53	16	40	11	2	1	24	0	0	0	0	0	0	1	1	14
4	1	1	28	15	5	11	1	1	29	0	1	1	1	1	1	1	2	22
5	0	1	52	9	30	11	1	1	8	0	0	0	1	0	0	1	1	12
6	0	1	48	6	20	10	1	1	22	0	1	1	0	0	1	1	1	11
7	1	1	46	9	30	8	1	1	8	1	1	0	0	0	1	1	6	10
8	1	1	39	15	18	8	2	1	10	0	1	0	0	1	1	1	4	6
9	1	1	39	16	12	9	1	1	7	0	0	0	1	0	1	0	4	12
10	1	1	35	9	21	8	1	1	32	1	0	0	1	0	1	1	1	15
11	1	1	37	9	24	17	1	1	10	1	0	0	1	0	0	1	3	14
12	1	1	31	16	13	7	1	1	9	1	1	0	0	1	1	1	2	11
13	1	1	33	9	15	9	1	1	7	0	0	0	0	1	1	0	6	23
14	0	1	40	15	16	7	2	1	34	0	0	0	0	1	0	1	1	13
15	1	1	38	15	20	8	2	1	20	1	1	0	0	0	1	1	2	24
16	1	1	47	9	30	7	2	1	28	0	0	0	0	0	1	1	2	13
17	1	1	37	15	15	7	1	1	32	0	0	0	1	0	1	1	2	10
18	1	1	60	15	30	6	1	1	8	0	1	0	1	1	1	1	8	13
19	1	1	51	16	33	7	1	1	6	0	0	0	1	0	1	0	7	14
20	1	1	28	15	13	7	1	1	30	0	1	0	0	1	1	1	2	13
21	1	1	32	16	13	10	2	1	5	0	0	1	1	0	1	0	8	16
22	1	1	53	15	30	11	1	1	17	0	1	0	1	0	1	1	6	19
23	1	1	29	15	10	14	1	1	35	0	1	1	0	0	1	1	2	18
24	1	1	42	9	21	10	1	1	5	0	1	0	1	1	1	0	6	13
25	1	1	28	15	11	6	2	1	35	1	1	0	1	1	1	1	1	15
26	0	1	33	15	6	8	1	1	32	0	0	1	0	0	0	1	4	14
27	1	1	55	6	31	6	1	1	4	1	1	0	1	0	1	0	4	24
28	0	1	42	9	22	7	1	2	7	0	1	1	0	0	1	0	1	13
29	1	1	49	12	40	7	2	1	5	0	1	1	1	0	1	0	2	14
30	1	1	50	9	35	10	1	2	27	0	0	1	0	0	1	1	4	25
31	1	1	61	6	40	12	2	2	8	0	0	0	1	0	0	1	5	15
32	1	1	30	15	16	7	5	2	26	0	1	0	1	1	1	1	1	11
33	0	1	45	9	20	12	3	2	36	1	0	0	1	1	1	1	3	24
34	1	1	53	9	30	13	21	2	35	1	0	0	1	0	1	1	1	10
35	1	1	29	9	10	10	1	2	33	0	1	0	1	0	1	1	1	19
36	1	1	60	9	40	13	3	2	36	0	0	1	1	0	1	1	4	10
37	1	1	60	9	40	13	2	2	33	1	0	1	1	0	0	1	1	10
38	1	1	50	16	30	11	6	2	31	1	0	1	0	1	1	1	1	30
39	0	1	34	12	15	11	1	2	17	1	0	0	0	0	0	1	4	4
40	1	1	36	9	16	13	1	2	14	1	1	0	0	1	1	1	5	15
41	1	1	37	6	20	12	1	2	24	1	1	0	0	0	1	1	1	23
42	1	1	45	16	20	10	5	2	26	1	1	0	0	0	1	1	1	30
43	1	1	45	15	25	10	2	2	26	1	1	0	1	1	1	1	1	27
44	1	1	52	16	20	9	1	2	13	0	0	0	0	0	1	1	1	2
45	1	1	44	16	31	9	1	2	30	0	0	0	0	0	0	1	3	21
46	1	1	44	6	30	8	1	2	23	0	0	0	1	0	1	1	1	7
47	1	1	41	15	22	9	5	2	26	1	1	1	1	0	1	1	1	14
48	1	1	40	9	20	11	4	2	30	1	0	0	1	0	1	1	1	18
49	1	1	53	6	25	8	4	2	20	1	1	0	0	0	1	1	1	2
50	1	1	39	6	10	7	1	2	15	0	1	0	1	0	1	1	1	20
51	1	1	42	15	10	6	1	2	23	0	0	0	1	0	0	1	1	18
52	1	1	62	15	30	8	5	2	28	1	1	0	1	1	1	1	1	26
53	1	1	41	16	23	14	8	2	18	1	1	0	0	0	1	1	1	6
54	1	1	41	16	21	8	3	2	35	0	0	1	0	0	0	1	1	2
55	1	1	73	12	24	16	2	2	33	1	0	0	1	0	0	1	2	32
56	1	1	46	9	20	15	1	2	3	1	0	0	1	1	1	0	13	26
57	1	1	46	9	20	14	3	2	23	1	0	0	1	0	1	1	2	8
58	1	1	53	9	32	24	2	2	35	1	0	0	1	0	1	1	2	18
59	1	1	63	12	30	7	4	2	31	1	1	1	1	0	1	1	1	19
60	1	1	35	9	13	8	3	2	11	1	1	0	1	1	1	1	2	29
61	1	1	38	15	23	8	1	2	18	1	0	1	1	0	1	1	2	17
62	1	1	54	9	30	9	1	2	33	0	0	0	1	0	1	1	2	9
63	1	1	35	16	11	6	5	2	28	1	1	0	0	0	1	1	1	13
64	1	1	63	6	40	7	1	2	9	0	1	1	1	0	1	1	5	13
65	1	1	47	9	31	8	2	2	35	1	1	1	1	0	1	1	3	13
66	1	1	43	9	22	9	1	2	8	1	1	0	1	0	1	1	3	10
67	1	1	63	15	20	10	4	2	36	1	1	1	0	0	1	1	1	17
68	1	1	36	9	20	6	3	2	31	0	0	0	1	0	1	1	1	13
69	1	1	53	9	10	8	1	2	36	0	1	0	0	0	1	1	1	12
70	0	1	56	12	36	8	1	1	0	1	0	1	1	0	1	0	14	18
71	1	1	40	9	20	7	1	1	0	0	1	1	0	0	1	0	14	12
72	1	1	61	9	40	13	1	1	0	1	0	0	1	0	0	0	12	10
73	1	1	43	12	16	13	1	1	0	1	0	0	1	0	1	0	13	14
74	1	1	46	9	30	10	2	1	0	0	0	0	0	0	1	0	12	13
75	1	1	55	9	30	13	1	1	0	1	0	0	1	1	0	0	12	19
76	1	1	40	9	10	11	2	1	0	0	1	0	0	1	1	0	10	10
77	1	1	40	15	20	12	1	1	0	0	1	0	0	0	1	0	11	28
78	1	1	52	16	30	10	1	1	0	1	0	0	1	0	1	0	9	21
79	1	1	43	15	20	10	2	1	0	1	0	0	0	1	1	0	8	15
80	1	1	33	12	16	8	1	1	0	0	1	0	0	0	1	0	8	13
81	1	1	50	9	30	8	1	1	0	0	1	1	0	0	1	0	8	10
82	1	1	50	9	30	8	1	1	0	1	1	0	1	0	1	0	7	13
83	1	1	41	16	20	8	2	1	0	0	1	1	0	0	1	0	13	15
84	0	1	28	16	10	6	1	1	0	0	1	0	1	0	1	0	8	15
85	0	1	47	6	30	17	3	1	8	0	1	0	1	0	1	1	21	18
86	1	1	31	9	15	8	2	1	0	0	1	0	1	1	1	0	11	19
87	0	1	36	15	9	21	1	1	0	0	1	0	1	0	1	0	17	20
88	1	1	53	6	30	11	1	1	0	1	0	0	1	0	0	0	9	12
89	1	1	40	9	23	17	2	1	0	0	1	0	0	1	1	0	12	15
90	1	1	34	9	10	8	1	1	0	1	1	0	1	0	1	0	14	14
91	0	1	29	9	11	10	2	1	0	0	1	0	1	0	1	0	12	14
92	1	1	36	15	20	12	3	2	0	1	0	0	1	0	1	0	11	20
93	1	1	38	16	10	11	1	1	0	1	1	1	1	0	1	0	9	27
94	1	1	25	9	6	7	2	2	0	0	1	1	1	1	1	0	9	13
95	1	1	50	9	30	11	1	2	0	1	0	1	1	0	0	0	11	14
96	1	1	59	9	26	10	1	2	0	1	0	1	1	1	1	0	10	13
97	1	1	56	9	35	10	4	2	0	0	1	1	1	0	1	0	9	36
98	1	1	46	12	9	9	3	2	0	0	1	0	1	0	1	0	8	15
99	1	1	42	6	24	8	2	2	0	0	0	1	1	0	1	0	8	11
100	1	1	55	9	30	8	1	2	0	1	1	1	1	0	1	0	7	11
101	1	1	62	9	11	8	1	2	0	1	0	0	1	0	0	0	8	34
102	1	1	53	9	30	7	1	2	0	1	1	0	1	0	1	0	8	10
103	1	1	53	6	36	8	2	2	0	0	1	1	1	0	1	0	9	14
104	1	1	54	9	30	8	1	2	0	1	0	0	1	0	1	0	9	13
105	0	1	62	15	41	8	2	2	0	0	1	0	0	1	1	0	9	13
106	1	1	36	9	18	8	7	2	0	1	0	0	0	1	0	0	8	11
107	1	1	42	12	20	9	1	2	0	1	0	0	1	0	1	0	7	12
108	1	1	44	15	20	8	1	2	0	0	1	1	1	0	1	0	7	14
109	1	1	63	6	40	6	1	2	0	1	0	0	1	0	1	0	7	7
110	1	1	49	9	36	7	2	2	10	0	0	0	1	0	1	1	8	14
111	1	1	28	9	13	6	1	2	0	1	0	0	1	0	0	0	24	18
112	1	1	47	9	20	6	1	2	0	0	0	1	1	0	1	0	24	17
113	1	1	45	12	31	7	1	2	0	1	0	1	0	0	1	0	24	22
114	1	1	41	12	22	11	4	2	0	0	1	0	1	1	1	0	7	12
115	1	1	51	12	30	13	1	1	17	0	1	1	0	0	1	1	2	8
116	1	1	36	16	16	6	1	1	20	1	0	0	1	0	1	1	1	17
117	1	1	43	16	25	8	1	1	31	0	1	1	1	1	1	1	4	9
118	1	1	56	15	42	8	1	1	4	0	1	1	1	0	1	0	1	10
119	1	1	44	15	20	9	1	1	0	0	0	0	1	1	1	0	12	13
120	1	1	49	15	25	10	1	1	0	0	0	1	1	1	0	0	15	12
121	1	1	36	15	20	7	1	1	1	0	1	0	0	0	1	0	9	15
122	1	1	42	12	11	7	2	2	0	0	1	0	1	1	1	0	9	14
